# Supplementary material for: Effect of Obesity among Hospitalized Cancer Patients with or without COVID-19 on a National Level
Source: MDPI journal article supplement (doi:10.3390/cancers14225660), 2022-11-17
Supplement: s1 [file s1]

**Table S1.** Characteristics of non-COVID-19 cancer patients by obesity.

|                                                 | No obesity<br>(1) | Obesity<br>(2) | p-value<br>(1 vs 2) | Standard<br>obesity<br>(3) | Morbid<br>obesity<br>(4) | Massive<br>obesity<br>(5) | p-value<br>(1 vs 3) | p-value<br>(1 vs 4) | p-value<br>(1 vs 5) |
|-------------------------------------------------|-------------------|----------------|---------------------|----------------------------|--------------------------|---------------------------|---------------------|---------------------|---------------------|
| <b>N</b>                                        | 892774            | 47035          |                     | 39138                      | 6915                     | 982                       |                     |                     |                     |
| <b>Men, n(%)</b>                                | 494171 (55.35)    | 23431 (49.82)  | <0.01               | 20872 (53.33)              | 2345 (33.91)             | 214 (21.79)               | <0.01               | <0.01               | <0.01               |
| <b>Age, mean (std)</b>                          | 68.74 (14.78)     | 66.95 (12.20)  | <0.01               | 67.43 (12.14)              | 64.82 (12.27)            | 62.55 (11.69)             | <0.01               | <0.01               | <0.01               |
| <b>Age group (years)</b>                        |                   |                | <0.01               |                            |                          |                           | <0.01               | <0.01               | <0.01               |
| ≤40                                             | 38123 (4.27)      | 1477 (3.14)    |                     | 1122 (2.87)                | 308 (4.45)               | 47 (4.79)                 |                     |                     |                     |
| 41-50                                           | 53745 (6.02)      | 3001 (6.38)    |                     | 2343 (5.99)                | 555 (8.03)               | 103 (10.49)               |                     |                     |                     |
| 51-80                                           | 605181 (67.79)    | 36756 (78.15)  |                     | 30470 (77.85)              | 5498 (79.51)             | 788 (80.24)               |                     |                     |                     |
| 81-90                                           | 161624 (18.10)    | 5294 (11.26)   |                     | 4727 (12.08)               | 527 (7.62)               | 40 (4.07)                 |                     |                     |                     |
| >90                                             | 34101 (3.82)      | 507 (1.08)     |                     | 476 (1.22)                 | 27 (0.39)                | 4 (0.41)                  |                     |                     |                     |
| <b>Chemotherapy, n(%)</b>                       | 260703 (29.20)    | 9254 (19.67)   | <0.01               | 7739 (19.77)               | 1353 (19.57)             | 162 (16.50)               | <0.01               | <0.01               | <0.01               |
| <b>Comorbidities, n(%)</b>                      |                   |                |                     |                            |                          |                           |                     |                     |                     |
| Hypertension                                    | 212207 (23.77)    | 23589 (50.15)  | <0.01               | 19693 (50.32)              | 3426 (49.54)             | 470 (47.86)               | <0.01               | <0.01               | <0.01               |
| Dementia                                        | 18903 (2.12)      | 510 (1.08)     | <0.01               | 439 (1.12)                 | 61 (0.88)                | 10 (1.02)                 | <0.01               | <0.01               | 0.02                |
| HIV                                             | 2344 (0.26)       | 79 (0.17)      | <0.01               | 69 (0.18)                  | 9 (0.13)                 | 1 (0.10)                  | <0.01               | 0.03                | 0.53                |
| Heart failure                                   | 31778 (3.56)      | 2621 (5.57)    | <0.01               | 2046 (5.23)                | 484 (7)                  | 91 (9.27)                 | <0.01               | <0.01               | <0.01               |
| Chronic respiratory disease                     | 8124 (0.91)       | 1206 (2.56)    | <0.01               | 798 (2.04)                 | 326 (4.71)               | 82 (8.35)                 | <0.01               | <0.01               | <0.01               |
| Chronic kidney disease                          | 37915 (4.25)      | 3537 (7.52)    | <0.01               | 2900 (7.41)                | 548 (7.92)               | 89 (9.06)                 | <0.01               | <0.01               | <0.01               |
| Cirrhosis                                       | 17076 (1.91)      | 1651 (3.51)    | <0.01               | 1354 (3.46)                | 260 (3.76)               | 37 (3.77)                 | <0.01               | <0.01               | <0.01               |
| Diabetes                                        | 99028 (11.09)     | 14377 (30.57)  | <0.01               | 11597 (29.63)              | 2424 (35.05)             | 356 (36.25)               | <0.01               | <0.01               | <0.01               |
| Peripheral vascular disease                     | 26972 (3.02)      | 2156 (4.58)    | <0.01               | 1935 (4.94)                | 202 (2.92)               | 19 (1.93)                 | <0.01               | 0.63                | 0.05                |
| Dyslipidemia                                    | 43087 (4.83)      | 5852 (12.44)   | <0.01               | 5070 (12.95)               | 696 (10.07)              | 86 (8.76)                 | <0.01               | <0.01               | <0.01               |
| Deficiency Anemia                               | 32308 (3.62)      | 1991 (4.23)    | <0.01               | 1611 (4.12)                | 314 (4.54)               | 66 (6.72)                 | <0.01               | <0.01               | <0.01               |
| COPD                                            | 39392 (4.41)      | 3791 (8.06)    | <0.01               | 3123 (7.98)                | 583 (8.43)               | 85 (8.66)                 | <0.01               | <0.01               | <0.01               |
| Pulmonary bacterial infection                   | 12418 (1.39)      | 712 (1.51)     | 0.03                | 552 (1.41)                 | 128 (1.85)               | 32 (3.26)                 | 0.75                | <0.01               | <0.01               |
| <b>Outcomes, n(%)</b>                           |                   |                |                     |                            |                          |                           |                     |                     |                     |
| Admission to ICU                                | 56365 (6.31)      | 4903 (10.42)   | <0.01               | 3922 (10.02)               | 816 (11.80)              | 165 (16.80)               | <0.01               | <0.01               | <0.01               |
| Severe complication during the inclusion stay   | 283502 (31.76)    | 18412 (39.15)  | <0.01               | 14932 (38.15)              | 2973 (42.99)             | 507 (51.63)               | <0.01               | <0.01               | <0.01               |
| In-hospital mortality during the inclusion stay | 65751 (7.36)      | 2125 (4.52)    | <0.01               | 1608 (4.11)                | 412 (5.96)               | 105 (10.69)               | <0.01               | <0.01               | <0.01               |
| Severe complication within 90 days              | 369908 (41.43)    | 21989 (46.75)  | <0.01               | 17861 (45.64)              | 3543 (51.24)             | 585 (59.57)               | <0.01               | <0.01               | <0.01               |
| In-hospital mortality within 90 days            | 120698 (13.52)    | 3993 (8.49)    | <0.01               | 3107 (7.94)                | 736 (10.64)              | 150 (15.27)               | <0.01               | <0.01               | 0.11                |

**Table S2.** Type of cancer by obesity among non-COVID-19 cancer patients.

|                                         | No obesity<br>(1) | Obesity<br>(2) | p-value<br>(1 vs 2) | Standard<br>obesity<br>(3) | Morbid<br>obesity<br>(4) | Massive<br>obesity<br>(5) | p-value<br>(1 vs 3) | p-value<br>(1 vs 4) | p-value<br>(1 vs 5) |
|-----------------------------------------|-------------------|----------------|---------------------|----------------------------|--------------------------|---------------------------|---------------------|---------------------|---------------------|
| <b>N</b>                                | 892774            | 47035          |                     | 39138                      | 6915                     | 982                       |                     |                     |                     |
| Hematological cancer, n(%)              | 93329 (10.45)     | 3994 (8.49)    | <0.01               | 3235 (8.27)                | 651 (9.41)               | 108 (11)                  | <0.01               | <0.01               | 0.58                |
| Solid Cancer with metastasis, n(%)      | 265076 (29.69)    | 11579 (24.62)  | <0.01               | 9603 (24.54)               | 1743 (25.21)             | 233 (23.73)               | <0.01               | <0.01               | <0.01               |
| Solid Cancer with localized tumor, n(%) | 534369 (59.85)    | 31462 (66.89)  | <0.01               | 26300 (67.20)              | 4521 (65.38)             | 641 (65.27)               | <0.01               | <0.01               | <0.01               |

**Table S3.** Admission to ICU, severe complication and in-hospital mortality of non COVID-19 cancer patients by type of cancer and obesity.

|                                                 | No obesity<br>(1)           | Obesity<br>(2)          | p-value<br>(1 vs 2) | Standard<br>obesity<br>(3)          | Morbid<br>obesity<br>(4)         | Massive<br>obesity<br>(5)        | p-value<br>(1 vs 3) | p-value<br>(1 vs 4) | p-value<br>(1 vs 5) |
|-------------------------------------------------|-----------------------------|-------------------------|---------------------|-------------------------------------|----------------------------------|----------------------------------|---------------------|---------------------|---------------------|
| <b>Hematological cancer</b>                     | 93329                       | 3994                    |                     | 3235                                | 651                              | 108                              |                     |                     |                     |
| Admission to ICU                                | 15023 (16.10)               | 888 (22.23)             | <0.01               | 713 (22.04)                         | 149 (22.89)                      | 26 (24.07)                       | <0.01               | <0.01               | 0.02                |
| Severe complication during the inclusion stay   | 39511 (42.34)               | 2216 (55.48)            | <0.01               | 1758 (54.34)                        | 393 (60.37)                      | 65 (60.19)                       | <0.01               | <0.01               | <0.01               |
| In-hospital mortality during the inclusion stay | 7614 (8.16)                 | 293 (7.34)              | 0.06                | 221 (6.83)                          | 61 (9.37)                        | 11 (10.19)                       | <0.01               | 0.26                | 0.44                |
| Severe complication within 90 days              | 49419 (52.95)               | 2544 (63.70)            | <0.01               | 2022 (62.50)                        | 448 (68.82)                      | 74 (68.52)                       | <0.01               | <0.01               | <0.01               |
| In-hospital mortality within 90 days            | 13126 (14.06)               | 468 (11.72)             | <0.01               | 360 (11.13)                         | 92 (14.13)                       | 16 (14.81)                       | <0.01               | 0.96                | 0.82                |
| <b>Solid Cancer with metastasis</b>             | No obesity<br>(1)<br>265076 | Obesity<br>(2)<br>11579 | p-value<br>(1 vs 2) | Standard<br>obesity<br>(3)<br>9603  | Morbid<br>obesity<br>(4)<br>1743 | Massive<br>obesity<br>(5)<br>233 | p-value<br>(1 vs 3) | p-value<br>(1 vs 4) | p-value<br>(1 vs 5) |
| Admission to ICU                                | 14131 (5.33)                | 1187 (10.25)            | <0.01               | 970 (10.10)                         | 180 (10.33)                      | 37 (15.88)                       | <0.01               | <.001               | <0.01               |
| Severe complication during the inclusion stay   | 94587 (35.68)               | 4955 (42.79)            | <0.01               | 3998 (41.63)                        | 816 (46.82)                      | 141 (60.52)                      | <0.01               | <0.01               | <0.01               |
| In-hospital mortality during the inclusion stay | 37211 (14.04)               | 1004 (8.67)             | <0.01               | 765 (7.97)                          | 193 (11.07)                      | 46 (19.74)                       | <0.01               | <0.01               | 0.01                |
| Severe complication within 90 days              | 123224 (46.49)              | 6018 (51.97)            | <0.01               | 4863 (50.64)                        | 992 (56.91)                      | 163 (69.96)                      | <0.01               | <0.01               | <0.01               |
| In-hospital mortality within 90 days            | 67324 (25.40)               | 1905 (16.45)            | <0.01               | 1491 (15.53)                        | 349 (20.02)                      | 65 (27.90)                       | <0.01               | <0.01               | 0.38                |
| <b>Solid Cancer with localized tumor</b>        | No obesity<br>(1)<br>534369 | Obesity<br>(2)<br>31462 | p-value<br>(1 vs 2) | Standard<br>obesity<br>(3)<br>26300 | Morbid<br>obesity<br>(4)<br>4521 | Massive<br>obesity<br>(5)<br>641 | p-value<br>(1 vs 3) | p-value<br>(1 vs 4) | p-value<br>(1 vs 5) |
| Admission to ICU                                | 27211 (5.09)                | 2828 (8.99)             | <0.01               | 2239 (8.51)                         | 487 (10.77)                      | 102 (15.91)                      | <0.01               | <0.01               | <0.01               |
| Severe complication during the inclusion stay   | 149404 (27.96)              | 11241 (35.76)           | <0.01               | 9176 (34.89)                        | 1764 (39.02)                     | 301 (46.96)                      | <0.01               | <0.01               | <0.01               |
| In-hospital mortality during the inclusion stay | 20926 (3.92)                | 828 (2.63)              | <0.01               | 622 (2.37)                          | 158 (3.49)                       | 48 (7.49)                        | <0.01               | 0.15                | <0.01               |
| Severe complication within 90 days              | 197265 (36.92)              | 13427 (42.68)           | <0.01               | 10976 (41.73)                       | 2103 (46.52)                     | 348 (54.29)                      | <0.01               | <0.01               | <0.01               |
| In-hospital mortality within 90 days            | 40248 (7.53)                | 1620 (5.15)             | <0.01               | 1256 (4.78)                         | 295 (6.53)                       | 69 (10.76)                       | <0.01               | 0.01                | <0.01               |

**Table S4.** Effect of obesity by type of cancer on the different outcomes, among non COVID-19 cancer patients.

|                                          | In-hospital mortality during the stay * | Severe complications during the stay * | Intensive care support during the stay * | In-hospital mortality within 90 days ** | Severe complications within 90 days *** |
|------------------------------------------|-----------------------------------------|----------------------------------------|------------------------------------------|-----------------------------------------|-----------------------------------------|
|                                          | OR [95% CI]                             | OR [95% CI]                            | OR [95% CI]                              | HR [95% CI]                             | HR [95% CI]                             |
| <b>All cancer</b>                        | 0.620 [0.592-0.649]                     | 1.340 [1.311-1.370]                    | 1.530 [1.481-1.580]                      | 0.648 [0.628-0.669]                     | 1.116 [1.103-1.128]                     |
| <b>Hematological cancer</b>              | 0.877 [0.773-0.994]                     | 1.491 [1.385-1.604]                    | 1.396 [1.288-1.514]                      | 0.830 [0.756-0.912]                     | 1.148 [1.115-1.183]                     |
| <b>Solid Cancer with metastasis</b>      | 0.588 [0.550-0.629]                     | 1.261 [1.208-1.316]                    | 1.693 [1.586-1.807]                      | 0.638 [0.610-0.668]                     | 1.093 [1.070-1.117]                     |
| <b>Solid Cancer with localized tumor</b> | 0.676 [0.629-0.728]                     | 1.695 [1.357-1.434]                    | 1.515 [1.452-1.581]                      | 0.692 [0.658-0.728]                     | 1.137 [1.120-1.155]                     |

\* Logistic model adjusted on age class, sex, chemotherapy, dementia, heart failure, chronic respiratory disease, cirrhosis, diabetes, deficiency anemia and pulmonary bacterial infection; \*\* Cox model adjusted on age class, sex, dementia, heart failure, chronic respiratory disease, cirrhosis, diabetes, deficiency anemia and pulmonary bacterial infection; \*\*\* Fine & Gray model adjusted on age class, sex, dementia, heart failure, chronic respiratory disease, cirrhosis, diabetes, deficiency anemia and pulmonary bacterial infection.

**Table S5.** Effect of obesity according to its severity and by type of cancer on the different outcomes, among non COVID-19 cancer patients.

|                                          | In-hospital<br>mortality during the<br>stay * | Severe<br>complications<br>during the stay * | Intensive care<br>support during the<br>stay * | In-hospital<br>mortality within 90<br>days ** | Severe<br>complications<br>within 90 days *** |
|------------------------------------------|-----------------------------------------------|----------------------------------------------|------------------------------------------------|-----------------------------------------------|-----------------------------------------------|
|                                          | OR [95% CI]                                   | OR [95% CI]                                  | OR [95% CI]                                    | HR [95% CI]                                   | HR [95% CI]                                   |
| <b>All cancer</b>                        |                                               |                                              |                                                |                                               |                                               |
| Standard obesity                         | 0.559 [0.531-0.589]                           | 1.289 [1.258-1.320]                          | 1.488 [1.436-1.541]                            | 0.603 [0.581-0.625]                           | 1.090 [1.077-1.104]                           |
| Morbid obesity                           | 0.852 [0.769-0.944]                           | 1.581 [1.495-1.671]                          | 1.655 [1.532-1.787]                            | 0.839 [0.780-0.902]                           | 1.229 [1.195-1.264]                           |
| Massive obesity                          | 1.649 [1.336-2.035]                           | 2.190 [1.890-2.538]                          | 2.334 [1.954-2.788]                            | 1.247 [1.062-1.464]                           | 1.348 [1.246-1.459]                           |
| <b>Hematological cancer</b>              |                                               |                                              |                                                |                                               |                                               |
| Standard obesity                         | 0.798 [0.691-0.920]                           | 1.415 [1.305-1.533]                          | 1.417 [1.296-1.550]                            | 0.775 [0.697-0.861]                           | 1.129 [1.093-1.167]                           |
| Morbid obesity                           | 1.236 [0.940-1.626]                           | 1.892 [1.584-2.261]                          | 1.283 [1.058-1.556]                            | 1.080 [0.879-1.328]                           | 1.235 [1.154-1.321]                           |
| Massive obesity                          | 1.457 [0.769-2.762]                           | 1.810 [1.162-2.818]                          | 1.507 [0.952-2.386]                            | 1.195 [0.731-1.953]                           | 1.202 [1.013-1.427]                           |
| <b>Solid Cancer with metastasis</b>      |                                               |                                              |                                                |                                               |                                               |
| Standard obesity                         | 0.531 [0.492-0.572]                           | 1.203 [1.148-1.260]                          | 1.696 [1.579-1.821]                            | 0.594 [0.565-0.626]                           | 1.067 [1.042-1.092]                           |
| Morbid obesity                           | 0.816 [0.700-0.950]                           | 1.513 [1.359-1.685]                          | 1.602 [1.363-1.884]                            | 0.831 [0.748-0.924]                           | 1.207 [1.144-1.273]                           |
| Massive obesity                          | 1.614 [1.157-2.253]                           | 2.532 [1.880-3.411]                          | 2.231 [1.537-3.239]                            | 1.193 [0.935-1.522]                           | 1.353 [1.125-1.626]                           |
| <b>Solid Cancer with localized tumor</b> |                                               |                                              |                                                |                                               |                                               |
| Standard obesity                         | 0.603 [0.555-0.656]                           | 1.350 [1.310-1.391]                          | 1.452 [1.385-1.522]                            | 0.638 [0.603-0.675]                           | 1.111 [1.093-1.130]                           |
| Morbid obesity                           | 0.937 [0.793-1.106]                           | 1.608 [1.498-1.726]                          | 1.749 [1.583-1.933]                            | 0.906 [0.808-1.017]                           | 1.257 [1.212-1.304]                           |
| Massive obesity                          | 2.207 [1.616-3.013]                           | 2.190 [1.817-2.639]                          | 2.462 [1.958-3.096]                            | 1.602 [1.264-2.030]                           | 1.400 [1.276-1.537]                           |

\* Logistic model adjusted on age class, sex, chemotherapy, dementia, heart failure, chronic respiratory disease, cirrhosis, diabetes, deficiency anemia and pulmonary bacterial infection; \*\* Cox model adjusted on age class, sex, dementia, heart failure, chronic respiratory disease, cirrhosis, diabetes, deficiency anemia and pulmonary bacterial infection; \*\*\* Fine & Gray model adjusted on age class, sex, dementia, heart failure, chronic respiratory disease, cirrhosis, diabetes, deficiency anemia and pulmonary bacterial infection.
